# Supplementary material
Source: publisher site journal article supplement (https://zse.pensoft.net/article/99030/download/suppl/31/)
Supplement: Supplementary file 1

**Supplementary 1.** Mean inter- and intra- specific of K2P distances based on the COI gene of *Diplommatina* species. Numbers in bold indicate intra-specific genetic divergence.

|  | 1 | 2 | 3 | 4 | 5 | 6 | 7 | 8 | 9 | 10 | 11 | 12 | 13 | 14 | 15 | 16 | 17 | 18 |
| --- | --- | --- | --- | --- | --- | --- | --- | --- | --- | --- | --- | --- | --- | --- | --- | --- | --- | --- |
| 1. *D. bulonensis* sp. nov. | **0.00** |  |  |  |  |  |  |  |  |  |  |  |  |  |  |  |  |  |
| 2. *D. laemsonensis* sp. nov. | 0.13 | **0.00** |  |  |  |  |  |  |  |  |  |  |  |  |  |  |  |  |
| 3. *D. prakaiphetensis* sp. nov. | 0.14 | 0.07 | **0.01** |  |  |  |  |  |  |  |  |  |  |  |  |  |  |  |
| 4. *D. canaliculata* | 0.10 | 0.13 | 0.14 | **0.00** |  |  |  |  |  |  |  |  |  |  |  |  |  |  |
| 5. *D. centralis* | 0.16 | 0.14 | 0.14 | 0.13 | **-** |  |  |  |  |  |  |  |  |  |  |  |  |  |
| 6. *D. demorgani* | 0.10 | 0.17 | 0.15 | 0.09 | 0.11 | **-** |  |  |  |  |  |  |  |  |  |  |  |  |
| 7. *D. electa* | 0.18 | 0.17 | 0.19 | 0.16 | 0.05 | 0.12 | **0.01** |  |  |  |  |  |  |  |  |  |  |  |
| 8. *D. gomantongensis* | 0.13 | 0.17 | 0.15 | 0.09 | 0.16 | 0.12 | 0.17 | **-** |  |  |  |  |  |  |  |  |  |  |
| 9. *D. hidagai* | 0.14 | 0.17 | 0.16 | 0.12 | 0.11 | 0.07 | 0.12 | 0.16 | **0.00** |  |  |  |  |  |  |  |  |  |
| 10. *D. laidlawi* | 0.18 | 0.14 | 0.13 | 0.14 | 0.14 | 0.17 | 0.16 | 0.14 | 0.17 | **-** |  |  |  |  |  |  |  |  |
| 11. *D. naiyanetri* | 0.13 | 0.06 | 0.06 | 0.14 | 0.14 | 0.15 | 0.17 | 0.16 | 0.17 | 0.13 | **0.02** |  |  |  |  |  |  |  |
| 12. *D. plecta* | 0.13 | 0.18 | 0.17 | 0.11 | 0.10 | 0.06 | 0.10 | 0.14 | 0.06 | 0.19 | 0.17 | **-** |  |  |  |  |  |  |
| 13. *D. prava* | 0.13 | 0.17 | 0.18 | 0.10 | 0.10 | 0.06 | 0.11 | 0.14 | 0.07 | 0.18 | 0.16 | 0.04 | **-** |  |  |  |  |  |
| 14. *D. rubicunda* | 0.17 | 0.17 | 0.18 | 0.17 | 0.06 | 0.11 | 0.07 | 0.19 | 0.12 | 0.16 | 0.18 | 0.11 | 0.11 | **-** |  |  |  |  |
| 15. *D. suratensis* | 0.14 | 0.10 | 0.12 | 0.13 | 0.08 | 0.09 | 0.10 | 0.15 | 0.10 | 0.13 | 0.09 | 0.11 | 0.10 | 0.10 | - |  |  |  |
| 16. *D. ventriculus* | 0.11 | 0.17 | 0.17 | 0.10 | 0.10 | 0.05 | 0.11 | 0.13 | 0.08 | 0.17 | 0.16 | 0.05 | 0.05 | 0.13 | 0.09 | - |  |  |
| 17. *Diplommatina* sp. | 0.16 | 0.15 | 0.14 | 0.13 | 0.04 | 0.11 | 0.06 | 0.14 | 0.11 | 0.12 | 0.13 | 0.10 | 0.10 | 0.06 | 0.07 | 0.10 | - |  |
| 18. *Diplommatina* sp. | 0.19 | 0.19 | 0.16 | 0.17 | 0.15 | 0.22 | 0.15 | 0.13 | 0.21 | 0.13 | 0.17 | 0.20 | 0.19 | 0.15 | 0.19 | 0.21 | 0.13 | - |
| 19. *Diplommatina* sp. | 0.12 | 0.20 | 0.19 | 0.10 | 0.18 | 0.12 | 0.20 | 0.13 | 0.15 | 0.18 | 0.18 | 0.12 | 0.13 | 0.21 | 0.18 | 0.12 | 0.19 | 0.17 |

**Supplementary 2.** Mean inter- and intra- specific of K2P distances based on the 16S of *Diplommatina* species. Numbers in bold indicate intra-specific genetic divergence.

|  | 1 | 2 | 3 | 4 | 5 | 6 | 7 | 8 | 9 | 10 | 11 | 12 | 13 | 14 | 15 | 16 | 17 | 18 |
| --- | --- | --- | --- | --- | --- | --- | --- | --- | --- | --- | --- | --- | --- | --- | --- | --- | --- | --- |
| 1. *D. bulonensis* sp. nov. | **0.00** |  |  |  |  |  |  |  |  |  |  |  |  |  |  |  |  |  |
| 2. *D. laemsonensis* sp. nov. | 0.17 | **0.00** |  |  |  |  |  |  |  |  |  |  |  |  |  |  |  |  |
| 3. *D. prakaiphetensis* sp. nov. | 0.18 | 0.06 | **0.00** |  |  |  |  |  |  |  |  |  |  |  |  |  |  |  |
| 4. *D. canaliculata* | 0.04 | 0.19 | 0.19 | **0.01** |  |  |  |  |  |  |  |  |  |  |  |  |  |  |
| 5. *D. centralis* | 0.16 | 0.11 | 0.11 | 0.15 | - |  |  |  |  |  |  |  |  |  |  |  |  |  |
| 6. *D. demorgani* | 0.06 | 0.17 | 0.18 | 0.07 | 0.17 | - |  |  |  |  |  |  |  |  |  |  |  |  |
| 7. *D. electa* | 0.16 | 0.11 | 0.10 | 0.15 | 0.07 | 0.14 | **0.00** |  |  |  |  |  |  |  |  |  |  |  |
| 8. *D. gomantongensis* | 0.10 | 0.16 | 0.15 | 0.12 | 0.15 | 0.13 | 0.15 | - |  |  |  |  |  |  |  |  |  |  |
| 9. *D. hidagai* | 0.07 | 0.17 | 0.17 | 0.08 | 0.14 | 0.11 | 0.14 | 0.12 | **0.01** |  |  |  |  |  |  |  |  |  |
| 10. *D. laidlawi* | 0.14 | 0.11 | 0.12 | 0.16 | 0.10 | 0.15 | 0.08 | 0.14 | 0.13 | - |  |  |  |  |  |  |  |  |
| 11. *D. naiyanetri* | 0.17 | 0.06 | 0.05 | 0.18 | 0.12 | 0.16 | 0.10 | 0.18 | 0.16 | 0.10 | **0.01** |  |  |  |  |  |  |  |
| 12. *D. plecta* | 0.10 | 0.15 | 0.17 | 0.12 | 0.14 | 0.10 | 0.15 | 0.12 | 0.11 | 0.13 | 0.16 | - |  |  |  |  |  |  |
| 13. *D. prava* | 0.08 | 0.19 | 0.21 | 0.10 | 0.16 | 0.10 | 0.13 | 0.14 | 0.13 | 0.15 | 0.18 | 0.10 | - |  |  |  |  |  |
| 14. *D. rubicunda* | 0.14 | 0.09 | 0.10 | 0.14 | 0.07 | 0.15 | 0.04 | 0.14 | 0.13 | 0.08 | 0.10 | 0.14 | 0.13 | - |  |  |  |  |
| 15. *D. suratensis* | 0.19 | 0.05 | 0.04 | 0.18 | 0.12 | 0.19 | 0.11 | 0.18 | 0.16 | 0.12 | 0.04 | 0.17 | 0.20 | 0.10 | - |  |  |  |
| 16. *D. ventriculus* | 0.04 | 0.16 | 0.20 | 0.08 | 0.18 | 0.06 | 0.18 | 0.11 | 0.11 | 0.16 | 0.18 | 0.13 | 0.10 | 0.15 | 0.19 | - |  |  |
| 17. *Diplommatina* sp. | 0.15 | 0.12 | 0.11 | 0.14 | 0.08 | 0.12 | 0.03 | 0.16 | 0.13 | 0.09 | 0.11 | 0.14 | 0.12 | 0.05 | 0.11 | 0.15 | - |  |
| 18. *Diplommatina* sp. | 0.16 | 0.10 | 0.09 | 0.15 | 0.07 | 0.15 | 0.05 | 0.16 | 0.14 | 0.08 | 0.09 | 0.15 | 0.14 | 0.05 | 0.09 | 0.17 | 0.05 | - |
| 19. *Diplommatina* sp. | 0.06 | 0.20 | 0.18 | 0.05 | 0.17 | 0.08 | 0.16 | 0.11 | 0.09 | 0.16 | 0.19 | 0.11 | 0.10 | 0.15 | 0.20 | 0.08 | 0.16 | 0.16 |
